# Supplementary material for: Normal Tissue Complication Probability (NTCP) Prediction Model for Osteoradionecrosis of the Mandible in Patients With Head and Neck Cancer After Radiation Therapy: Large-Scale Observational Cohort
Source: PubMed Central journal article supplement — Int J Radiat Oncol Biol Phys. Author manuscript; Available in PMC 2022 Mar 9. (PMC8906058; doi:10.1016/j.ijrobp.2021.04.042), 2021-06-10
Supplement: NIHMS1701222-supplement-Supp_materials.pdf [file NIHMS1701222-supplement-Supp_materials.pdf]

## Appendix 1

Figure. Patient inclusion diagram

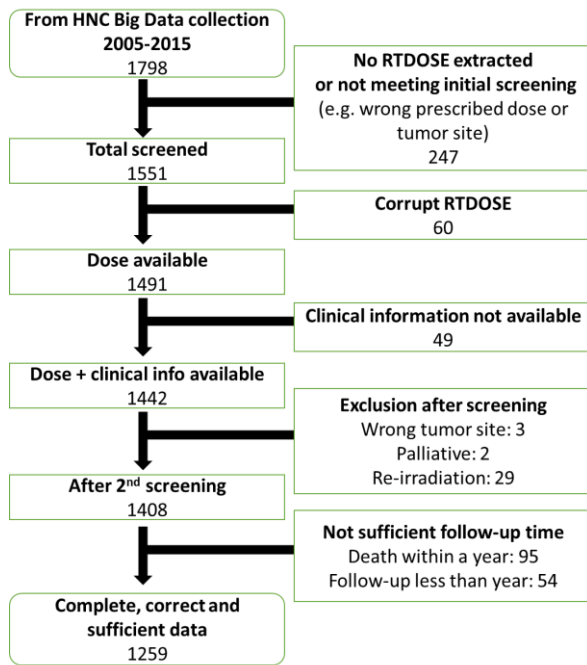

## Appendix 2

Table. Full Univariable analysis table for ORN any grade (I-IV) and Grade IV

| Variable          | ORN Grade I-IV |                  |     |      |         | ORN Grade IV |                   |     |     |      |         |
|-------------------|----------------|------------------|-----|------|---------|--------------|-------------------|-----|-----|------|---------|
|                   | $\beta$        | OR (95%CI)       | AIC | AUC  | p-value | $\beta$      | OR (95%CI)        | AIC | BIC | AUC  | p-value |
| D30               | 0.09           | 1.1 (1.07-1.12)  | 627 | 0.76 | <0.0001 | 0.11         | 1.12 (1.08-1.16)  | 306 | 316 | 0.80 | <0.0001 |
| D25               | 0.10           | 1.11 (1.08-1.13) | 629 | 0.76 | <0.0001 | 0.12         | 1.13 (1.08-1.18)  | 308 | 317 | 0.80 | <0.0001 |
| D35               | 0.09           | 1.09 (1.07-1.11) | 629 | 0.76 | <0.0001 | 0.10         | 1.11 (1.07-1.15)  | 308 | 317 | 0.79 | <0.0001 |
| D40               | 0.08           | 1.08 (1.06-1.1)  | 631 | 0.76 | <0.0001 | 0.09         | 1.1 (1.06-1.14)   | 308 | 317 | 0.79 | <0.0001 |
| D45               | 0.07           | 1.08 (1.06-1.1)  | 634 | 0.75 | <0.0001 | 0.09         | 1.09 (1.06-1.13)  | 309 | 318 | 0.79 | <0.0001 |
| D20               | 0.10           | 1.11 (1.08-1.14) | 638 | 0.75 | <0.0001 | 0.12         | 1.13 (1.08-1.19)  | 313 | 322 | 0.78 | <0.0001 |
| D50               | 0.07           | 1.07 (1.05-1.09) | 641 | 0.74 | <0.0001 | 0.08         | 1.08 (1.05-1.11)  | 313 | 323 | 0.77 | <0.0001 |
| mean              | 0.10           | 1.1 (1.07-1.13)  | 642 | 0.74 | <0.0001 | 0.10         | 1.1 (1.06-1.15)   | 320 | 330 | 0.75 | <0.0001 |
| V45               | 0.04           | 1.04 (1.03-1.05) | 642 | 0.75 | <0.0001 | 0.05         | 1.05 (1.03-1.06)  | 311 | 321 | 0.79 | <0.0001 |
| V50               | 0.04           | 1.04 (1.03-1.05) | 643 | 0.76 | <0.0001 | 0.04         | 1.05 (1.03-1.06)  | 309 | 318 | 0.81 | <0.0001 |
| V55               | 0.04           | 1.04 (1.03-1.05) | 644 | 0.76 | <0.0001 | 0.05         | 1.05 (1.03-1.06)  | 307 | 316 | 0.82 | <0.0001 |
| V40               | 0.04           | 1.04 (1.03-1.05) | 645 | 0.74 | <0.0001 | 0.05         | 1.05 (1.03-1.07)  | 315 | 325 | 0.77 | <0.0001 |
| D55               | 0.06           | 1.07 (1.05-1.08) | 646 | 0.74 | <0.0001 | 0.07         | 1.07 (1.05-1.1)   | 318 | 327 | 0.76 | <0.0001 |
| D15               | 0.10           | 1.11 (1.07-1.14) | 649 | 0.74 | <0.0001 | 0.12         | 1.13 (1.07-1.19)  | 320 | 329 | 0.75 | <0.0001 |
| V35               | 0.04           | 1.04 (1.03-1.05) | 652 | 0.72 | <0.0001 | 0.05         | 1.05 (1.03-1.07)  | 321 | 331 | 0.74 | <0.0001 |
| D60               | 0.06           | 1.06 (1.05-1.08) | 653 | 0.73 | <0.0001 | 0.06         | 1.07 (1.04-1.09)  | 323 | 332 | 0.74 | <0.0001 |
| D65               | 0.06           | 1.06 (1.04-1.08) | 659 | 0.72 | <0.0001 | 0.06         | 1.06 (1.04-1.09)  | 327 | 337 | 0.73 | <0.0001 |
| D10               | 0.10           | 1.1 (1.07-1.14)  | 661 | 0.71 | <0.0001 | 0.11         | 1.11 (1.05-1.17)  | 329 | 339 | 0.71 | 0.0001  |
| V30               | 0.04           | 1.04 (1.03-1.06) | 661 | 0.70 | <0.0001 | 0.05         | 1.05 (1.02-1.07)  | 329 | 339 | 0.71 | <0.0001 |
| V60               | 0.04           | 1.04 (1.03-1.05) | 661 | 0.74 | <0.0001 | 0.04         | 1.04 (1.03-1.06)  | 325 | 334 | 0.80 | <0.0001 |
| D70               | 0.05           | 1.06 (1.04-1.07) | 665 | 0.70 | <0.0001 | 0.05         | 1.06 (1.03-1.08)  | 331 | 340 | 0.71 | <0.0001 |
| V25               | 0.04           | 1.04 (1.03-1.06) | 673 | 0.68 | <0.0001 | 0.04         | 1.04 (1.02-1.07)  | 337 | 347 | 0.67 | 0.002   |
| D5                | 0.09           | 1.09 (1.05-1.13) | 675 | 0.68 | <0.0001 | 0.08         | 1.08 (1.03-1.15)  | 338 | 348 | 0.65 | 0.004   |
| D75               | 0.05           | 1.05 (1.04-1.07) | 675 | 0.69 | <0.0001 | 0.05         | 1.05 (1.02-1.07)  | 338 | 347 | 0.68 | <0.0001 |
| D80               | 0.05           | 1.05 (1.03-1.06) | 686 | 0.66 | <0.0001 | 0.04         | 1.04 (1.01-1.06)  | 344 | 353 | 0.62 | 0.002   |
| D2                | 0.07           | 1.07 (1.04-1.11) | 687 | 0.65 | <0.0001 | 0.06         | 1.06 (1.01-1.12)  | 344 | 353 | 0.61 | 0.023   |
| V20               | 0.04           | 1.04 (1.02-1.05) | 687 | 0.65 | <0.0001 | 0.03         | 1.03 (1-1.05)     | 345 | 355 | 0.61 | 0.021   |
| V65               | 0.04           | 1.04 (1.03-1.05) | 687 | 0.64 | <0.0001 | 0.03         | 1.03 (1.01-1.04)  | 347 | 357 | 0.58 | 0.005   |
| D85               | 0.05           | 1.05 (1.03-1.07) | 690 | 0.64 | <0.0001 | 0.04         | 1.04 (1.01-1.07)  | 345 | 354 | 0.61 | 0.003   |
| type              | -0.92          | 0.4 (0.28-0.56)  | 691 | 0.63 | <0.0001 | -1.34        | 0.26 (0.15-0.45)  | 329 | 339 | 0.68 | <0.0001 |
| V70               | 0.05           | 1.06 (1.03-1.08) | 691 | 0.62 | <0.0001 | 0.03         | 1.03 (1-1.06)     | 350 | 359 | 0.58 | 0.026   |
| maxGy             | 0.00           | 1 (1-1)          | 696 | 0.62 | 0.0005  | 0.00         | 1 (1-1)           | 348 | 358 | 0.57 | 0.076   |
| V15               | 0.03           | 1.03 (1.01-1.05) | 697 | 0.62 | 0.0002  | 0.02         | 1.02 (1-1.04)     | 349 | 359 | 0.56 | 0.075   |
| D90               | 0.05           | 1.05 (1.03-1.07) | 698 | 0.63 | <0.0001 | 0.04         | 1.04 (1.01-1.07)  | 348 | 358 | 0.60 | 0.016   |
| V10               | 0.03           | 1.03 (1.01-1.05) | 701 | 0.59 | 0.002   | 0.02         | 1.02 (1-1.04)     | 350 | 359 | 0.54 | 0.109   |
| Dental extraction | 0.87           | 2.39 (1.61-3.54) | 702 | 0.60 | <0.0001 | 0.86         | 2.36 (1.28-4.35)  | 346 | 356 | 0.60 | 0.006   |
| V5                | 0.04           | 1.04 (1.01-1.06) | 703 | 0.58 | 0.007   | 0.02         | 1.02 (0.99-1.05)  | 350 | 359 | 0.52 | 0.14    |
| D95               | 0.05           | 1.05 (1.03-1.08) | 704 | 0.61 | <0.0001 | 0.04         | 1.04 (1-1.07)     | 350 | 360 | 0.56 | 0.062   |
| D97               | 0.06           | 1.06 (1.03-1.09) | 706 | 0.60 | 0.0001  | 0.04         | 1.04 (0.99-1.08)  | 351 | 361 | 0.55 | 0.105   |
| D98               | 0.06           | 1.06 (1.03-1.09) | 708 | 0.60 | 0.0004  | 0.03         | 1.03 (0.99-1.08)  | 352 | 361 | 0.54 | 0.161   |
| D99               | 0.06           | 1.06 (1.02-1.1)  | 710 | 0.59 | 0.001   | 0.03         | 1.04 (0.98-1.09)  | 352 | 362 | 0.54 | 0.179   |
| minGy             | 0.00           | 1 (1-1)          | 714 | 0.58 | 0.012   | 0.00         | 1 (1-1)           | 353 | 362 | 0.54 | 0.325   |
| Chemotherapy      | 0.61           | 1.85 (1.06-3.21) | 715 | 0.54 | 0.029   | 0.14         | 1.15 (0.53-2.53)  | 353 | 363 | 0.51 | 0.721   |
| Gender            | 0.60           | 1.83 (0.98-3.41) | 716 | 0.53 | 0.059   | -0.04        | 0.96 (0.42-2.2)   | 354 | 363 | 0.50 | 0.926   |
| postop RT         | 0.52           | 1.68 (1.07-2.65) | 716 | 0.54 | 0.025   | 1.30         | 3.67 (1.96-6.88)  | 339 | 348 | 0.63 | <0.0001 |
| Age               | -0.01          | 0.99 (0.97-1.01) | 720 | 0.52 | 0.449   | -0.01        | 0.99 (0.96-1.02)  | 353 | 362 | 0.53 | 0.369   |
| pack years        | 0.00           | 1 (0.99-1.01)    | 720 | 0.50 | 0.699   | -0.01        | 0.99 (0.98-1.01)  | 352 | 362 | 0.52 | 0.251   |
| Smoking status    | 0.08           | 1.09 (0.62-1.91) | 720 | 0.50 | 0.776   | 1.25         | 3.48 (0.83-14.55) | 349 | 359 | 0.55 | 0.088   |
| Volume            | 0.00           | 1 (1-1)          | 720 | 0.51 | 0.662   | 0.00         | 1 (1-1)           | 354 | 363 | 0.52 | 0.817   |

### Appendix 3

**Figure.** For ORN any grade, frequency plots of variables selected during bootstrapped forward selection (ranked on AIC and with likelihood-ratio test  $p < 0.01$ ) in 5000 samples. Position of variable in the model was considered, i.e. forward selection selects per sample most important variable first, and adds variables in subsequent significant importance.

The  $D_{30\%}$  was most frequently selected as first variable (blue bar) in 50% of the bootstrap iterations, followed by the  $D_{25\%}$  in 23%. The most frequent second selected variable (green bar) was the variable *dental extraction* in 47% of the samples.

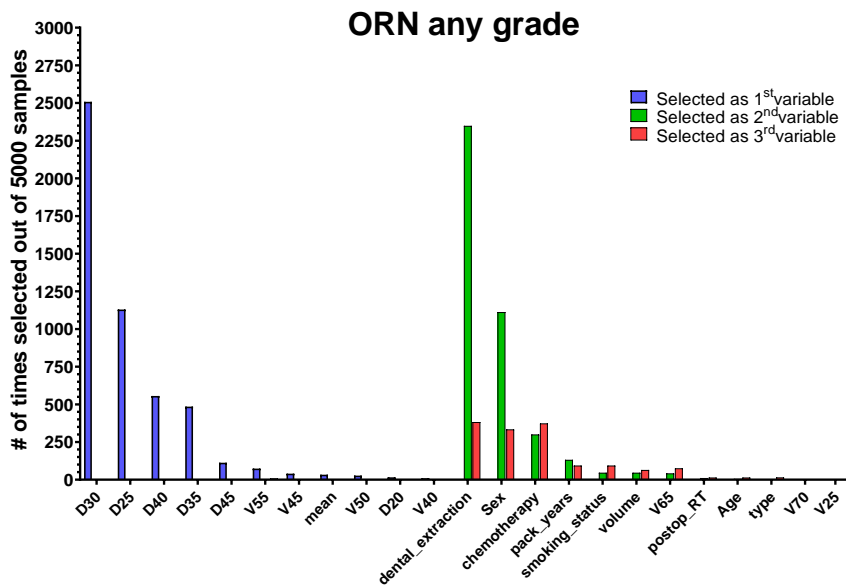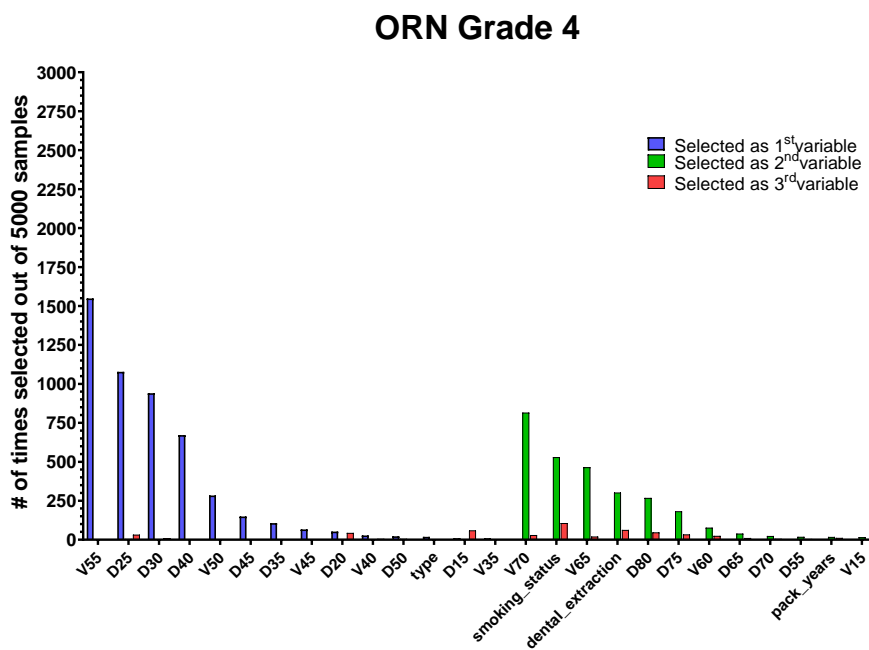

## Appendix 4

**Figure.** Calibration plots of the 'ORN NTCP models with  $D_{30\%}$  and dental extractions' in validation cohort.

*Method:* Patients were divided in 10 equal sized groups while ranked by predicted NTCP. In the figures below, the points represent the average predicted NTCP plotted against the actual observed ORN rate in that group. Dotted line represent the calibration line, and intercept and coefficients are given in red.

*Results:* Both calibration of the  $ORN_{I-IV}$  and  $ORN_{IV}$  NTCP models in the validation cohort showed that the calibration coefficient was significantly higher than 1 ( $p < 0.0001$ ), indicating that the produced NTCP values were an underestimation in the validation cohort. This was markedly more pronounced in the  $ORN_{I-IV}$  model. The intercept were not significant different than 0 in both models.

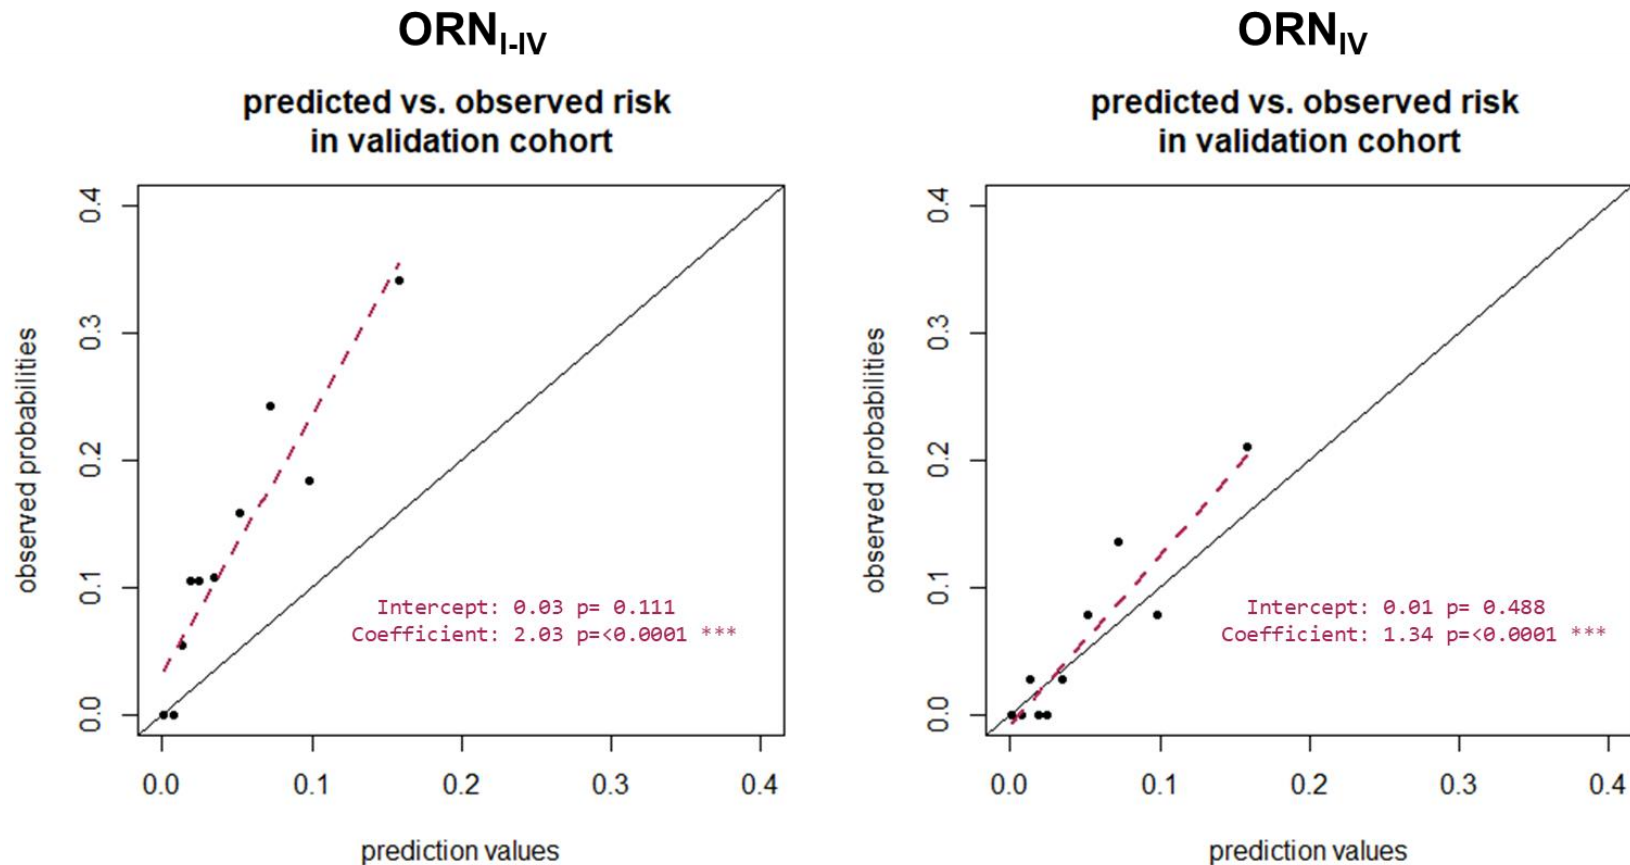

## Appendix 5

**Table.** Performance measures of the full scope of investigated NTCP models for ORN Grade IV

| Grade IV ORN                                    |                  |                  |                           |                  |                    |                  |
|-------------------------------------------------|------------------|------------------|---------------------------|------------------|--------------------|------------------|
|                                                 | D30              | V55              | <u>D30</u>                | D30              | V55                | V55              |
|                                                 | -                | -                | <u>Dental Extractions</u> | Smoking status   | Dental Extractions | Smoking status   |
| <b>Training (n=882)</b>                         |                  |                  |                           |                  |                    |                  |
| AIC                                             | 306.5            | 306.6            | <u>304.9</u>              | 302.3            | 303.6              | 302.5            |
| AUC training                                    | 0.80 (0.76-0.85) | 0.82 (0.78-0.87) | <u>0.81 (0.76-0.86)</u>   | 0.81 (0.76-0.86) | 0.82 (0.77-0.87)   | 0.82 (0.77-0.87) |
| Nagelkerke R <sup>2</sup> <sub>training</sub>   | 0.16             | 0.16             | <u>0.17</u>               | 0.18             | 0.17               | 0.17             |
| Discrimination slope                            | 0.05             | 0.06             | <u>0.06</u>               | 0.06             | 0.07               | 0.07             |
| HL test X <sup>2</sup> (p-value)                | 18.86 (0.02)     | 18.61 (0.02)     | <u>10.82 (0.21)</u>       | 11.7 (0.17)      | 10.17 (0.25)       | 8.58 (0.38)      |
| <b>Validation (n=377)</b>                       |                  |                  |                           |                  |                    |                  |
| AUC validation                                  | 0.81 (0.73-0.90) | 0.78 (0.69-0.87) | <u>0.82 (0.74-0.89)</u>   | 0.75 (0.64-0.86) | 0.78 (0.72-0.86)   | 0.71 (0.60-0.83) |
| Nagelkerke R <sup>2</sup> <sub>validation</sub> | 0.20             | 0.11             | <u>0.20</u>               | 0.14             | 0.12               | 0.07             |

## Appendix 6

Table 1. Performance of final NTCP models (Table 3;  $D_{30\%}$  and *Dental extraction*) in sub-cohorts. Where ‘Other’ are larynx/hypo/nasopharynx/unknown-primary cancer patients, OPC is oropharynx cancer patients

| ORN                           | Any grade         |                   |                   |                   | Grade IV          |                   |                   |
|-------------------------------|-------------------|-------------------|-------------------|-------------------|-------------------|-------------------|-------------------|
|                               | OPC               | Oral Cavity       | Other             | OPC/Other         | OPC               | Oral Cavity       | OPC/Other         |
|                               | D30               |
|                               | Dental extraction |
| AUC <sub>validation</sub>     | 0.76 (0.71-0.80)  | 0.59 (0.50-0.68)  | 0.76 (0.53-0.98)  | 0.79 (0.75-0.83)  | 0.80 (0.74-0.86)  | 0.57 (0.46-0.68)  | 0.84 (0.79-0.89)  |
| Nagelkerke $R^2_{validation}$ | 0.18              | 0.04              | 0.08              | 0.22              | 0.16              | 0.02              | 0.20              |

Table 2. Performance of final NTCP models (Table 3;  $D_{30\%}$  and *Dental extraction*) in sub-cohorts of patient treated **definitive** and **post-operative** radiotherapy

| ORN                           | Any grade         |                   | Grade IV          |                   |
|-------------------------------|-------------------|-------------------|-------------------|-------------------|
|                               | Definitive        | Post-operative    | Definitive        | Post-operative    |
|                               | D30               | D30               | D30               | D30               |
|                               | Dental extraction | Dental extraction | Dental extraction | Dental extraction |
| AUC <sub>validation</sub>     | 0.78 (0.74-0.82)  | 0.65 (0.57-0.73)  | 0.82 (0.77-0.88)  | 0.68 (0.59-0.77)  |
| Nagelkerke $R^2_{validation}$ | 0.20              | 0.11              | 0.18              | 0.12              |
